# Supplementary material for: NUDT21 lactylation reprograms alternative polyadenylation to promote cuproptosis resistance
Source: Springer Nature journal article supplement (doi:10.1038/s41421-025-00804-1), 2025-05-28
Supplement: MOESM1 [file 41421_2025_804_MOESM1_ESM.pdf]

# Supplementary Information for

## NUDT21 lactylation reprograms alternative polyadenylation to promote cuproptosis resistance

### Supplementary Figures

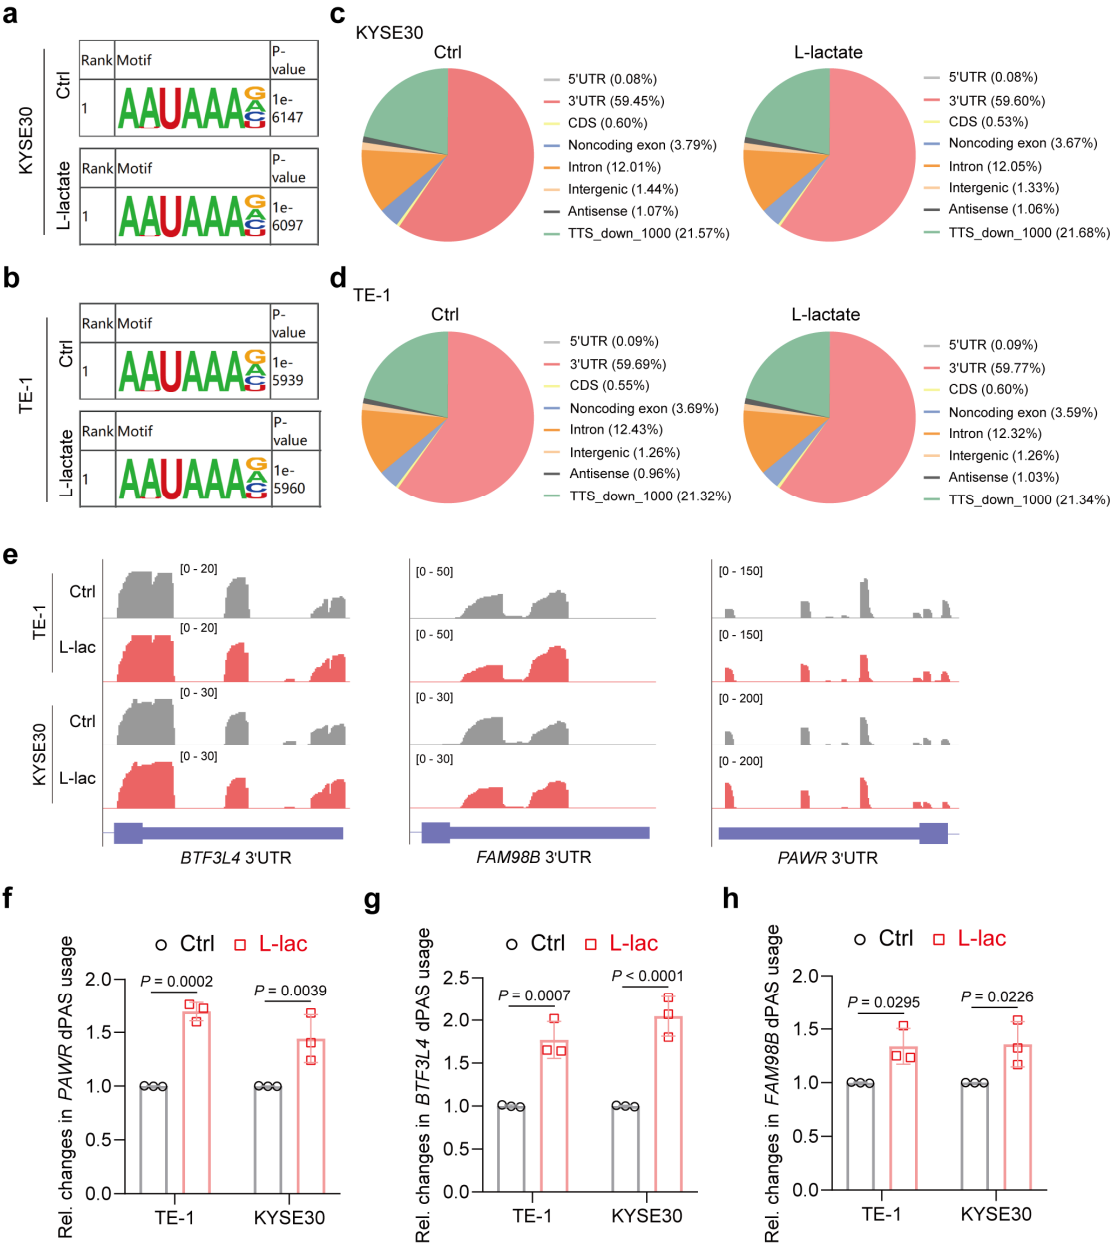

**Fig. S1 L-lactate regulates APA switch in ESCC cells.**

(a, b) The most enriched PAS motifs identified from PAS-seq analysis in KYSE30 and TE-1 cells.

**(c, d)** Pie charts illustrating the distribution of PASs from PAS-seq analysis in KYSE30 and TE-1 cells.

**(e)** PAS-seq density plots for *BTF3L4*, *FAM98B*, and *PAWR*, whose 3' UTRs are lengthened in response to L-lactate.

**(f-h)** RT-qPCR analysis of dPAS usage for *BTF3L4*, *FAM98B*, and *PAWR* in ESCC cells treated with L-lactate (20 mM) for 24 h.

Data are presented as mean  $\pm$  SD; *P* value was calculated by Student's *t* test (f-h).

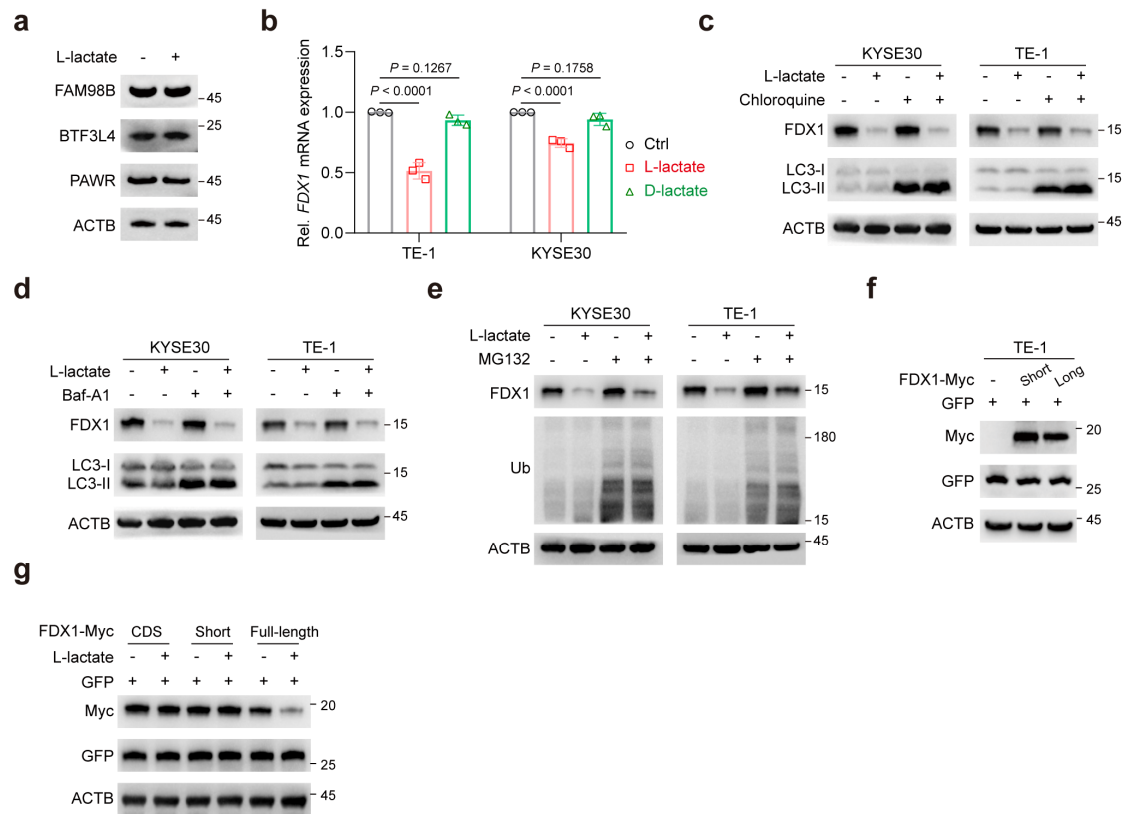

**Fig. S2 L-lactate upregulates FDX1 protein levels via APA.**

(a) Immunoblot analysis of BTF3L4, FAM98B, and PAWR protein levels in KYSE30 cells treated with L-lactate (20 mM) for 24 h.

(b) Relative mRNA expression of *FDX1* in ESCC cells treated with L-lactate (20 mM) or D-lactate (20 mM) for 24 h.

(c-e) Immunoblot analysis examining the effects of chloroquine (30  $\mu$ M, 12 h), Baf-A1 (20 nM, 3 h), or MG132 (10  $\mu$ M, 3 h) on the L-lactate-induced reduction of FDX1 protein levels.

(f, g) Immunoblot analysis of FDX1 and GFP protein levels in TE-1 cells transfected with the indicated plasmids.

Data are presented as mean  $\pm$  SD; *P* value was calculated by Student's *t* test (b).

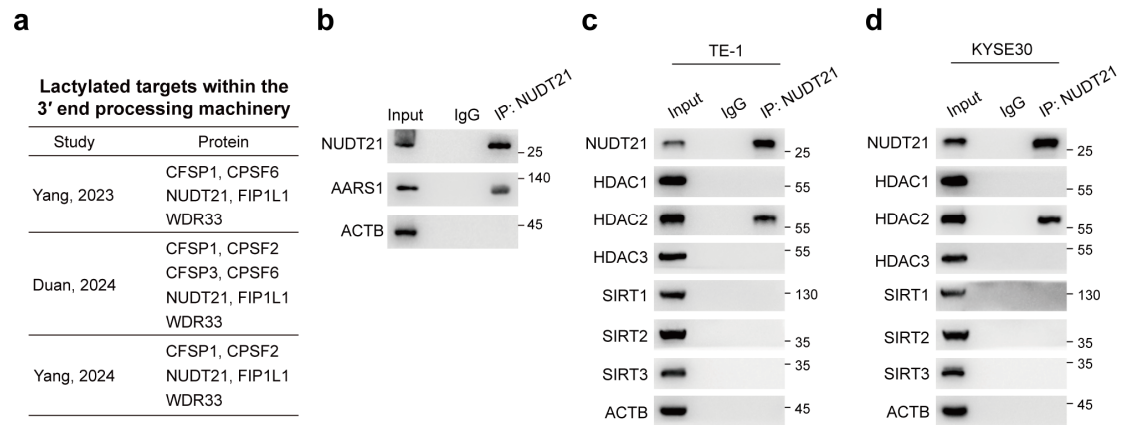

**Fig. S3 NUDT21 lactylation is regulated by AARS1 and HDAC2.**

(a) Table summarizing the lactylation of APA regulators identified by three integrated studies.

(b) The interaction between NUDT21 and AARS1 was detected by Co-IP in 293T cells.

(c, d) The interaction between NUDT21 and HDAC2 was detected by Co-IP in ESCC cells.

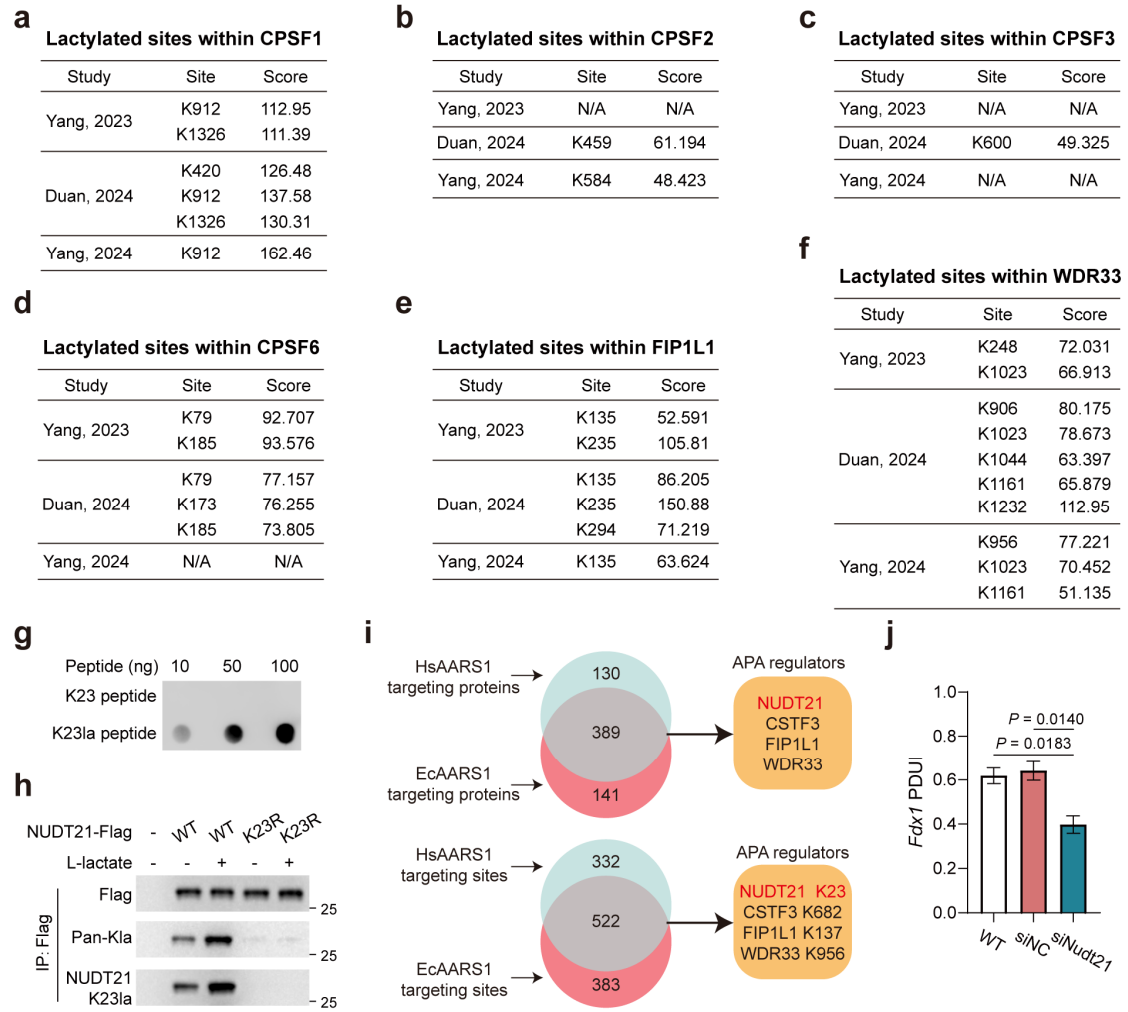

**Fig. S4 NUDT21 is lactylated at K23.**

(a-f) Table summarizing the lactylation sites of APA regulators identified by three integrated studies.

(g) Immunoblot analysis of synthetic peptides immobilized on a nitrocellulose membrane using an anti-NUDT21-K23la antibody.

(h) Immunoblot analysis of K23-lactylated NUDT21 levels in 293T cells transfected with NUDT21 WT or K23R mutant, with or without L-lactate (20 mM) stimulation for 24 h.

(i) Overlapping lactylated sites (lower) and proteins (upper) identified as targets of human AARS1 (HsAARS1) and *E. coli* AARS1 (EcAARS1).

(j) Analysis of the *Fdx1* PDUI in MEF cells following NUDT21 knockdown.

Data are presented as mean  $\pm$  SD; *P* value was calculated by Student's *t* test (j).

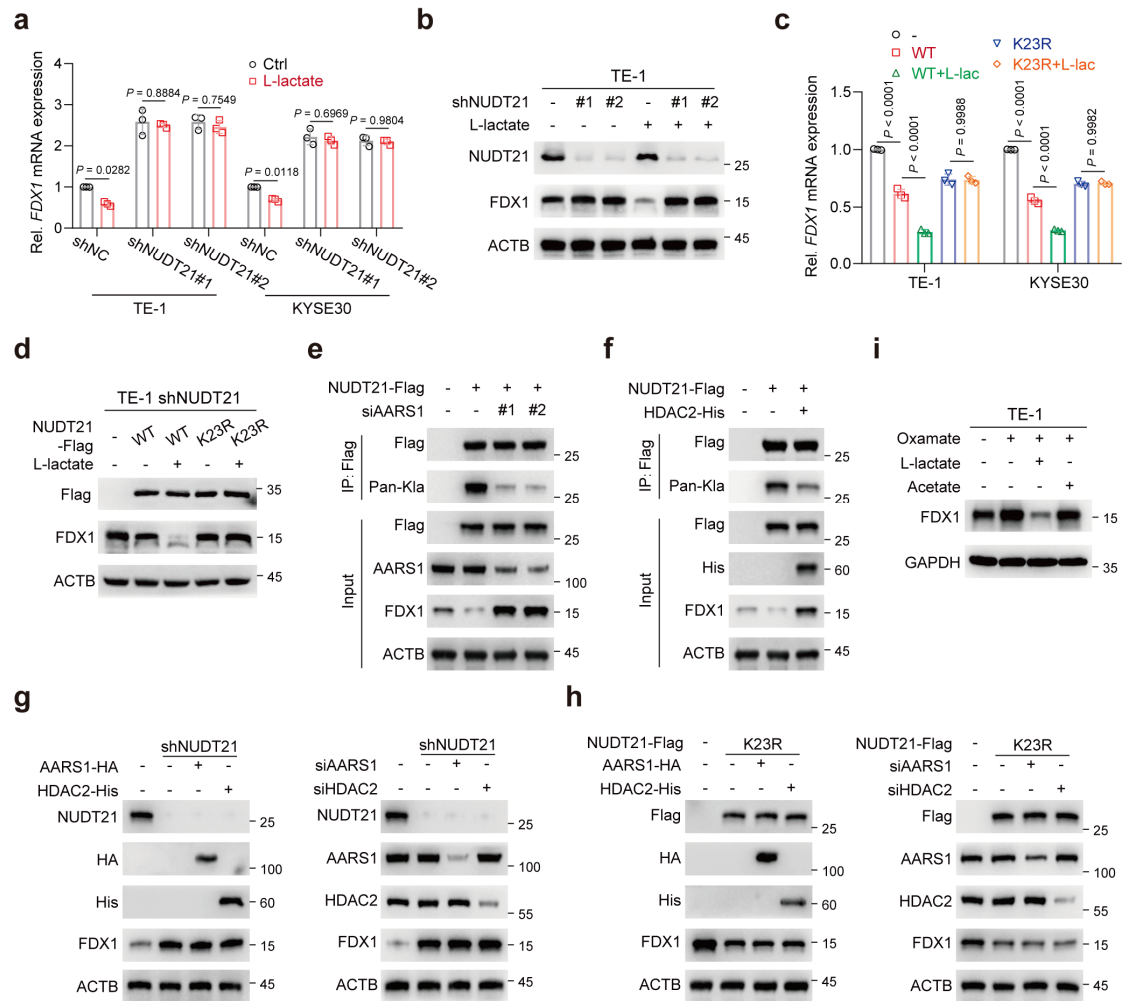

**Fig. S5 NUDT21 lactylation upregulates FDX1 protein levels.**

(a) Relative mRNA expression of *FDX1* in NUDT21 knockdown ESCC cells, with or without L-lactate (20 mM) stimulation for 24 h.

(b) Immunoblot analysis of FDX1 protein levels in TE-1 cells following NUDT21 knockdown, with or without L-lactate (20 mM) stimulation for 24 h.

(c) Relative mRNA expression of *FDX1* in NUDT21-knockdown ESCC cells transfected with NUDT21 WT or K23R mutant, with or without L-lactate (20 mM) stimulation for 24 h.

(d) Immunoblot analysis of FDX1 protein levels in NUDT21-knockdown TE-1 cells transfected with NUDT21 WT or K23R mutant, with or without L-lactate (20 mM) stimulation for 24 h.

(e, f) Immunoblot analysis of NUDT21 lactylation and FDX1 protein levels in KYSE30 cells transfected with AARS1-specific siRNAs (e) or HDAC2-Myc (f). Cells were pre-

treated with oxamate before harvest.

**(g, h)** Immunoblot analysis of FDX1 protein levels in NUDT21-knockdown (g) or NUDT21 K23R (h) KYSE30 cells transfected with the indicated plasmids or siRNAs.

**(i)** Immunoblot analysis of FDX1 protein levels in TE-1 cells treated with oxamate (20 mM), L-lactate (20 mM), or acetate (10 mM) for 24 h.

Data are presented as mean  $\pm$  SD; *P* value was calculated by Student's *t* test (a and c).

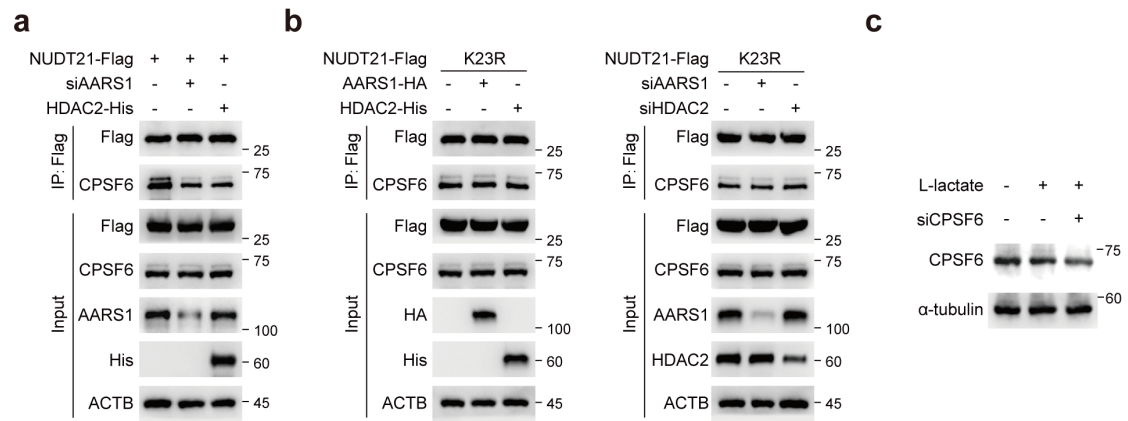

**Fig. S6 NUDT21 lactylation enhances its interaction with CPSF6.**

(a) Immunoblot analysis of the interaction between NUDT21 and CPSF6 in KYSE30 cells transfected with the indicated plasmids or siRNAs.

(b) Immunoblot analysis of the interaction between NUDT21 and CPSF6 in NUDT21 K23R cells transfected with the indicated plasmids or siRNAs.

(c) Immunoblot analysis of CPSF6 levels to test the silencing effect of CPSF6-specific siRNA in KYSE30 cells.



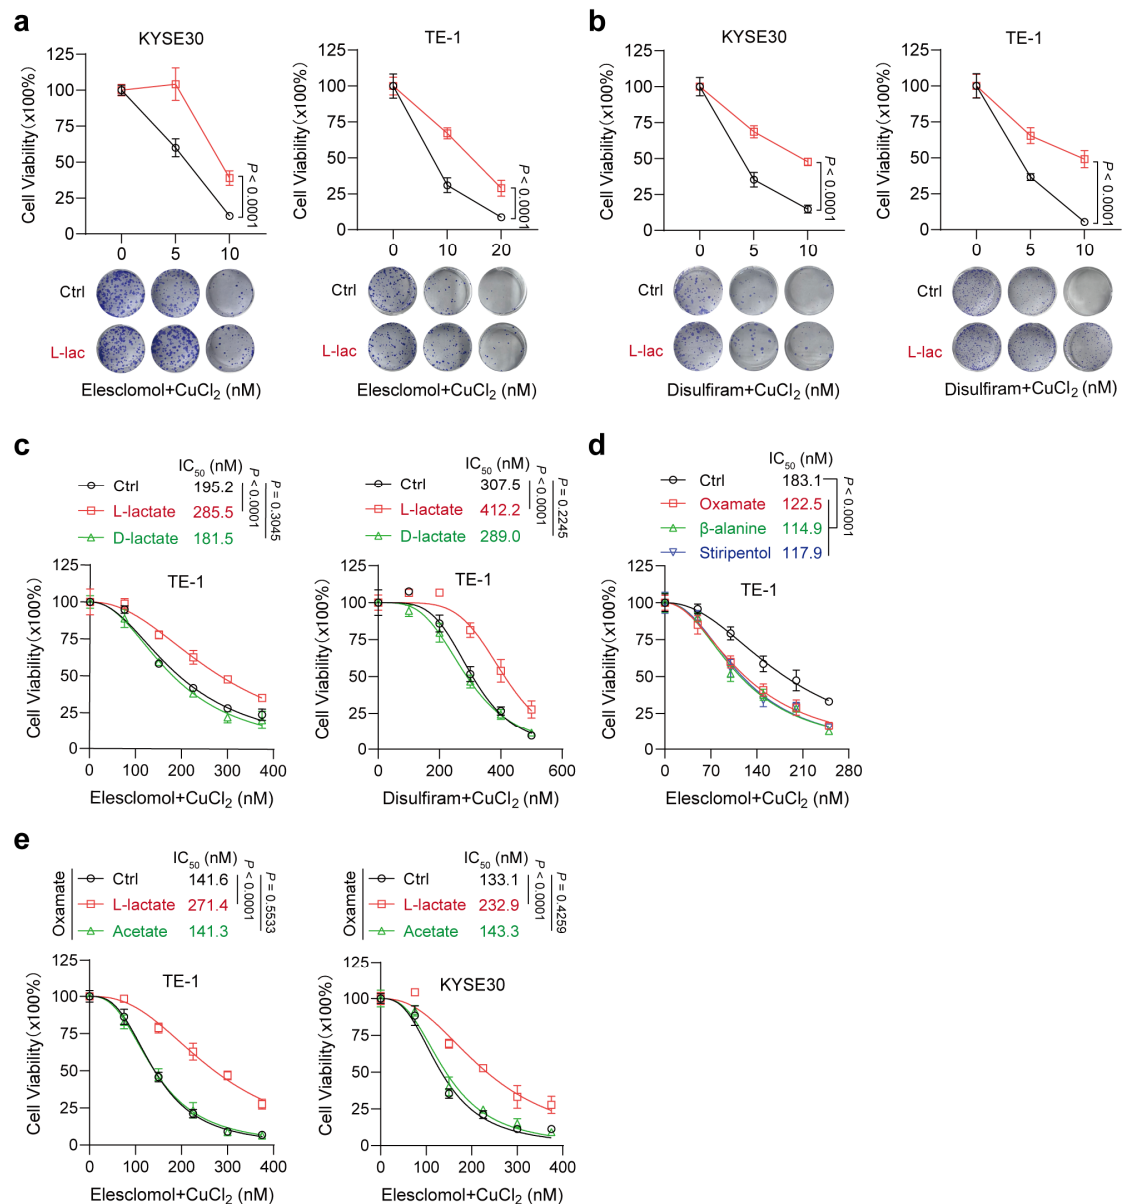

**Fig. S7 L-lactate promotes resistance to cuproptosis in ESCC.**

(a, b) The cell viability of L-lactate-treated KYESE30 and TE-1 cells in response to the indicated concentrations of elesclomol-Cu<sup>2+</sup> or disulfiram-Cu<sup>2+</sup>, as measured by colony formation assays.

(c-e) The cell viability of ESCC cells treated with L-lactate, D-lactate, oxamate,  $\beta$ -alanine, stiripentol, or acetate in response to elesclomol-Cu<sup>2+</sup> or disulfiram-Cu<sup>2+</sup>, as measured by CCK8.

Data are presented as mean  $\pm$  SD; *P* value was calculated by two-way ANOVA (a-e).

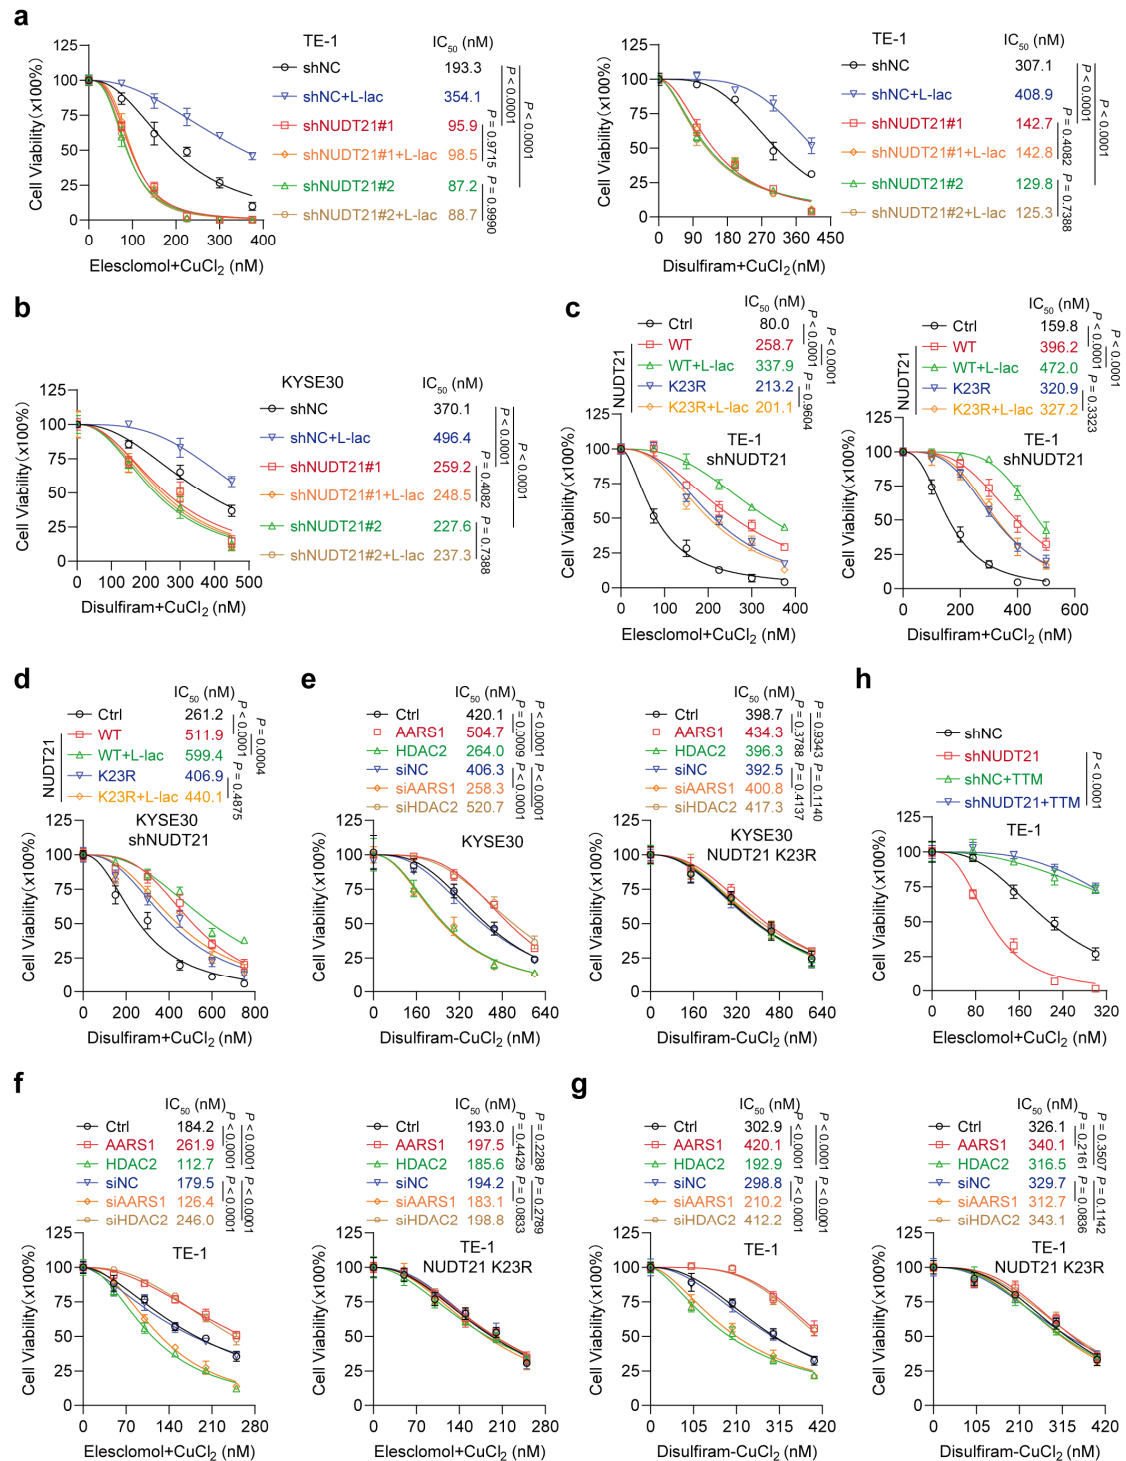

**Fig. S8 NUDT21 plays a key role in L-lactate-induced cuproptosis resistance.**

(a, b) The cell viability of NUDT21-knockdown ESCC cells following treatment with elesclomol-Cu<sup>2+</sup> or disulfiram-Cu<sup>2+</sup>, with or without L-lactate (20 mM), as measured by CCK8.

(c, d) The cell viability of NUDT21 WT- or K23R-overexpressing ESCC cells was measured by CCK8 after treatment with elesclomol-Cu<sup>2+</sup> or disulfiram-Cu<sup>2+</sup>, with or

without L-lactate (20 mM).

**(e-g)** The cell viability of ESCC cells transfected with the indicated plasmids or siRNAs in response to elesclomol-Cu<sup>2+</sup> or disulfiram-Cu<sup>2+</sup>, as measured by CCK8.

**(h)** TTM (1μM) treatment reversed the growth inhibition induced by NUDT21 knockdown in TE-1 cells exposed to elesclomol-Cu<sup>2+</sup>.

Data are presented as mean ± SD; *P* value was calculated by two-way ANOVA (a-h).

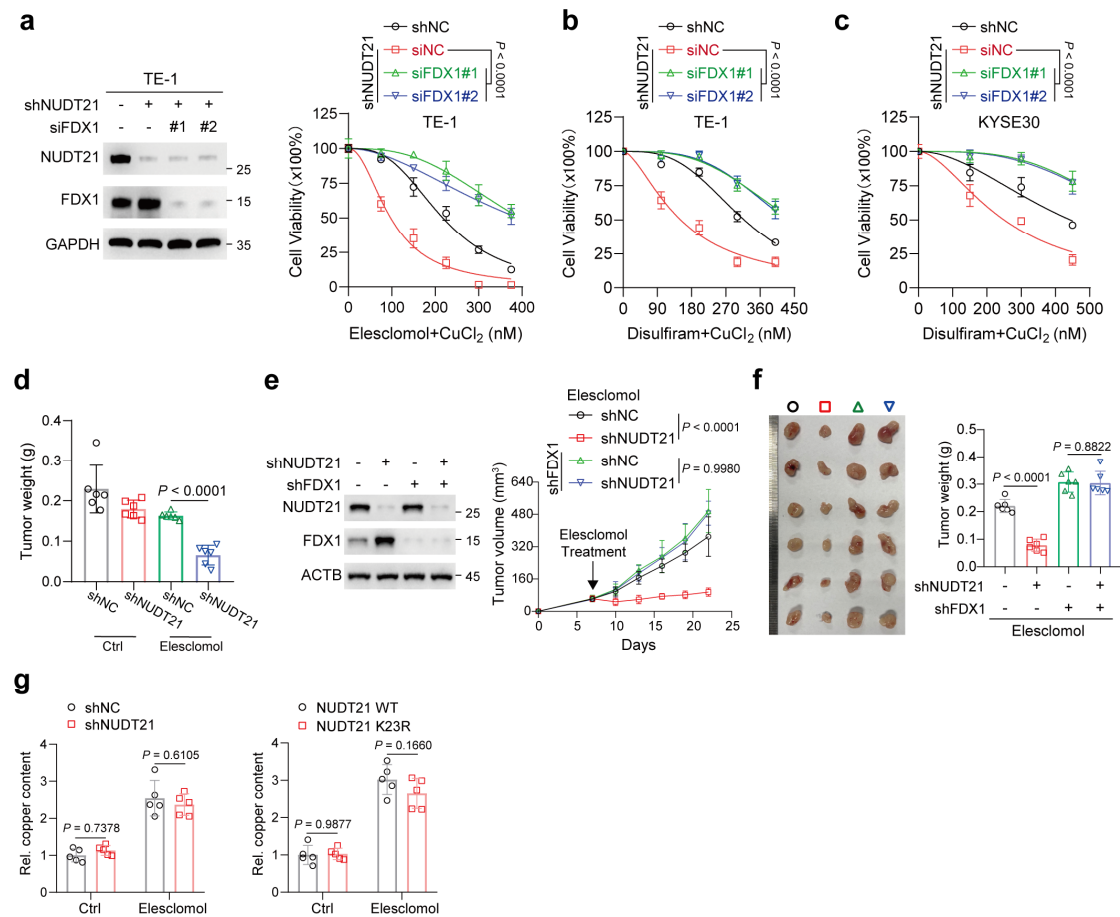

**Fig. S9 NUDT21 mediates cuproptosis resistance via FDX1.**

(a-c) FDX1 depletion reversed the growth inhibition induced by NUDT21 knockdown in ESCC cells treated with elesclomol-Cu<sup>2+</sup> or disulfiram-Cu<sup>2+</sup>, as measured by CCK8.

(d) Tumor weights of xenografts formed in BALB/c nude mice (n = 6) with KYSE30 cells.

(e, f) Subcutaneous tumors of nude mice with KYSE30 cells transfected with the indicated shRNAs (n = 6). Mice were treated with or without elesclomol. Tumor volume and weight were measured.

(g) Relative copper levels in xenograft tumors derived from different KYSE30 cells, with or without elesclomol treatment (n = 5).

Data are presented as mean  $\pm$  SD; *P* value was calculated by two-way ANOVA (a-c and e) and Student's *t* test (d, f, and g).

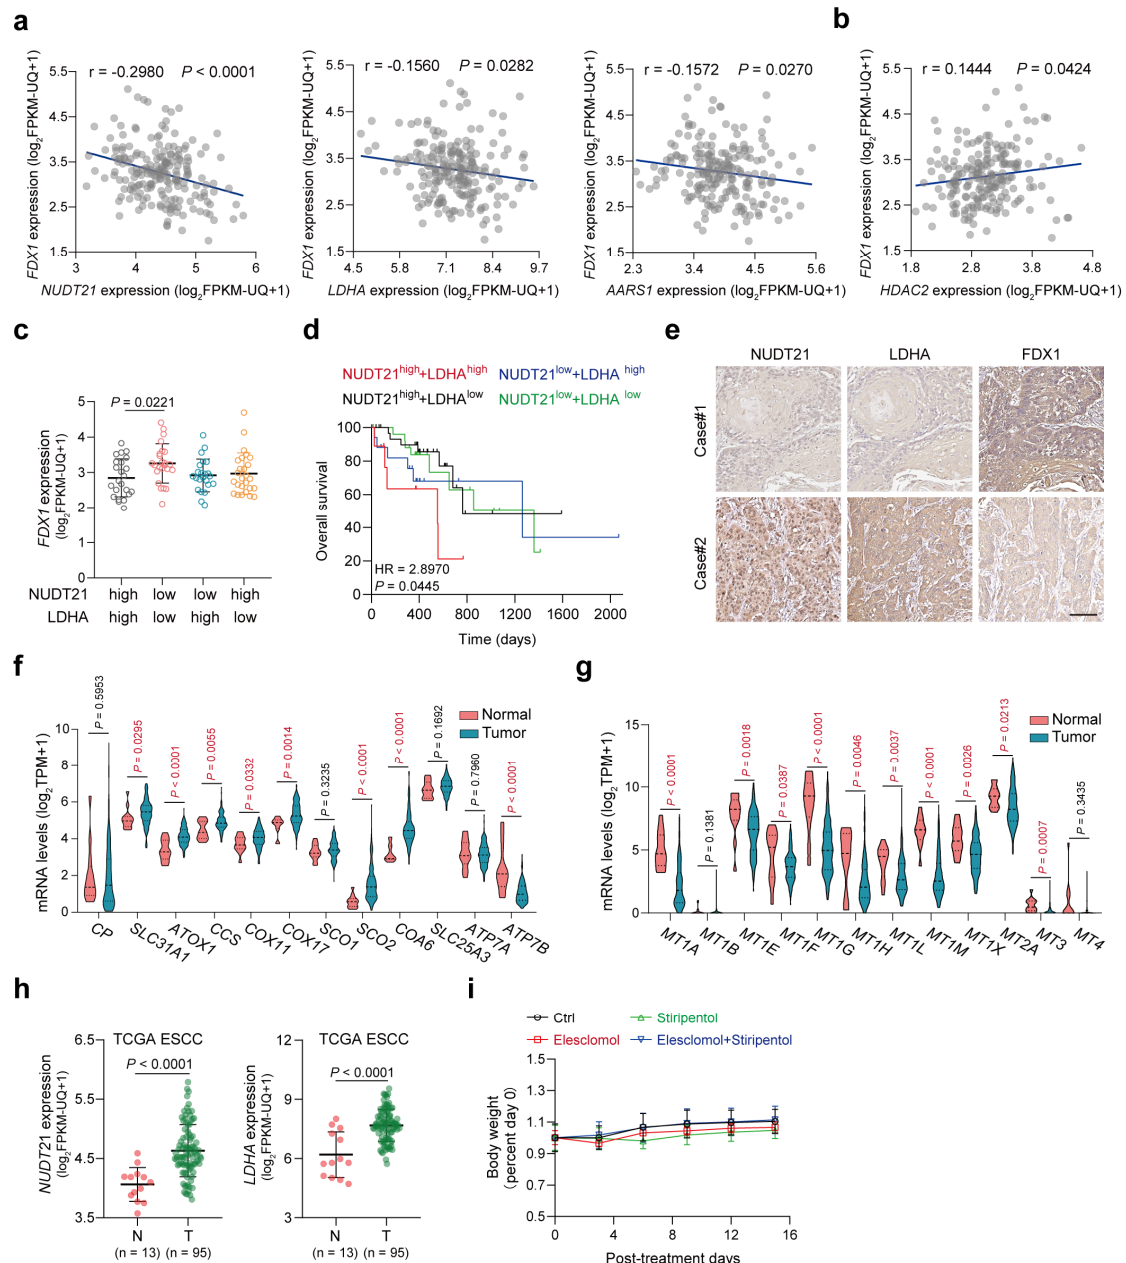

**Fig. S10 The lactate-NUDT21-FDX1-cuproptosis axis as a potential therapeutic target.**

(a) Scatter plots illustrating negative correlations between *FDX1* mRNA levels and those of *NUDT21*, *LDHA*, and *AARS1* in the esophageal cancer cohort.

(b) Scatter plots illustrating a positive correlation between *FDX1* and *HDAC2* in the esophageal cancer cohort.

(c) The mRNA expression levels of *FDX1* in the TCGA ESCC cohort stratified by *NUDT21* and *LDHA* expression levels.

(d) High expression levels of *NUDT21* and *LDHA* are correlated with the lowest overall

survival rate in the ESCC cohort.

(e) Representative IHC images of NUDT21, LDHA, and FDX1 staining in serial ESCC sections. Scale bars, 100  $\mu$ m.

(f, g) The expression levels of genes involved in copper homeostasis (f) and copper storage (g) in tumors versus normal samples from the TCGA ESCC cohort. Genes with significant differences ( $P < 0.05$ ) were highlighted in red.

(h) The mRNA expression levels of *NUDT21* and *LDHA* in the TCGA ESCC cohort.

(i) Mouse body weights were measured to assess the side effects of treatments.

Data are presented as mean  $\pm$  SD;  $P$  value was calculated by Pearson correlation analysis (a, b), Student's  $t$  test (c, f, g, and h), and log-rank test (d).

**Supplementary Table S1. The antibodies used in this study**

| <b>Name</b>       | <b>Manufacturer</b> | <b>Lot. No.</b> | <b>Source</b> | <b>Application</b> | <b>RRID</b> |
|-------------------|---------------------|-----------------|---------------|--------------------|-------------|
| NUDT21            | Proteintech         | 10322-1-AP      | Rabbit        | WB/IHC/IP/RIP      | AB_2251496  |
| FDX1              | Proteintech         | 12592-1-AP      | Rabbit        | WB/IHC             | AB_11182486 |
| LDHA              | Proteintech         | 19987-1-AP      | Rabbit        | WB/IHC             | AB_10646429 |
| Klac              | PTM Bio             | 1401RM          | Rabbit        | WB                 | AB_2942013  |
| Kac               | ABclonal            | A2391           | Rabbit        | WB                 | AB_2764337  |
| ACTB              | Proteintech         | 66009-1-IG      | Mouse         | WB                 | AB_2687938  |
| FAM98B            | Proteintech         | 22251-1-AP      | Rabbit        | WB                 | AB_2879049  |
| Ub                | CST                 | 3936S           | Mouse         | WB                 | AB_331292   |
| BTF3L4            | Proteintech         | F1804           | Rabbit        | WB                 | AB_2878265  |
| Flag              | CST                 | 14793S          | Rabbit        | WB/RIP             | AB_2572291  |
| Flag              | sigma               | F1804           | Mouse         | PLA                | AB_262044   |
| myc               | Proteintech         | 16286-1-AP      | Rabbit        | WB                 | AB_11182162 |
| PAWR              | Proteintech         | 20688-1-AP      | Rabbit        | WB                 | AB_10733473 |
| HA                | CST                 | 3724S           | Rabbit        | WB                 | AB_1549585  |
| CPSF6             | Proteintech         | 15489-1-AP      | Rabbit        | WB/PLA             | AB_10694140 |
| AARS1             | Proteintech         | 17394-1-AP      | Rabbit        | WB                 | AB_2219748  |
| $\alpha$ -tubulin | Proteintech         | 66031-1-Ig      | Mouse         | WB                 | AB_11042766 |
| HDAC2             | Abcam               | ab219053        | Rabbit        | WB                 |             |
| GAPDH             | Proteintech         | 60004-1-IG      | Rabbit        | WB                 | AB_2107436  |
| GFP               | Proteintech         | 66002-1-Ig      | Mouse         | WB                 | AB_11182611 |
| TRIP12            | Proteintech         | 25303-1-AP      | Rabbit        | WB                 | AB_2880020  |
| HDAC1             | Abcam               | ab150399        | Rabbit        | WB                 |             |
| HDAC3             | CST                 | D2O1K           | Rabbit        | WB                 | AB_2800047  |
| SIRT1             | Proteintech         | 13161-1-AP      | Rabbit        | WB                 | AB_10646436 |
| SIRT2             | Proteintech         | 19655-1-AP      | Rabbit        | WB                 | AB_2878592  |
| SIRT3             | Proteintech         | 10099-1-AP      | Rabbit        | WB                 | AB_2239240  |
| LC3               | Selleck             | F0144           | Rabbit        | WB                 |             |

**Supplementary Table S2. The primer sequences used for RT-PCR**

| <b>Gene</b>        | <b>Forward primer 5'-3'</b> | <b>Reverse primer 5'-3'</b> |
|--------------------|-----------------------------|-----------------------------|
| <i>FDX1</i>        | CCCTGGCTTGTTCAACCTGT        | CCCAACCGTGATCTGTCTGTTA      |
| <i>FDX1</i> dPAS   | AGGCAGAGATCTAACCTGGC        | AAGACACAGGTTCTAGCACAG       |
| <i>PAWR</i>        | TGCCGCAGAGTGCTTAGATG        | CCTGTAGCAGATAGGAACTGCC      |
| <i>PAWR</i> dPAS   | GCAGTGGCTCATGCCTGTAA        | AAGCACCTAACACAGCCTGG        |
| <i>FAM98B</i>      | TGGAGGCGCTGGGGTATAAA        | GAGAGCCTAACCAAATACAGAGC     |
| <i>FAM98B</i> dPAS | ACCCTTGAGCATGTTGTGTCT       | ACAGGTGAGGCAAGGGTCTA        |
| <i>BTF3L4</i>      | AACAAGCCTTAGGAAGTTAGCTG     | GCTTTACTGTCCAAGACTTGCC      |
| <i>BTF3L4</i> dPAS | TTCCTCTACCCTCCACCTGT        | GTGGTTCCCCCTAACTCTGC        |
| <i>ACTB</i>        | CCAACCGCGAGAAGATGA          | TCCATCACGATGCCAGTG          |



**Supplementary Table S3. The oligonucleotide sequence of siRNAs and shRNAs.**

| <b>genes</b> | <b>Sequence (5'-3')</b> |
|--------------|-------------------------|
| siFDX1#1     | ATGGACAATATGACTGTTCGA   |
| siFDX1#2     | GGACAATATGACTGTTCGA     |
| siHDAC2#1    | CCGTAATGTTGCTCGATGT     |
| siHDAC2#2    | GACCCATAACTTGCTGTTA     |
| siCPSF6      | GTTGTAACTCCATGCAATAAA   |
| siAARS1#1    | GCAGTGAGATCCACTACGA     |
| siAARS1#2    | GTTTGGCATTCCCATTGAA     |
| shNUDT21#1   | GAACCTCCTCAGTATCCATAT   |
| shNUDT21#2   | TGTACCCTCTTACCAATTATA   |
| shFDX1       | ATGGACAATATGACTGTTCGA   |
